# Supplementary material for: The uncharacterized protein FAM47E interacts with PRMT5 and regulates its functions
Source: PubMed Central journal article supplement (PMC7772775; doi:10.26508/lsa.202000699), 2020-12-29
Supplement: LSA-2020-00699_SdataF1.pdf [file LSA-2020-00699_SdataF1.pdf]

**Figure 1F:** Endogenous IP: FAM47E: Uncropped Images

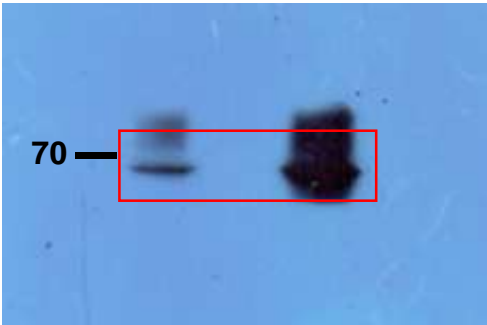

**IB:  $\alpha$ -PRMT5**

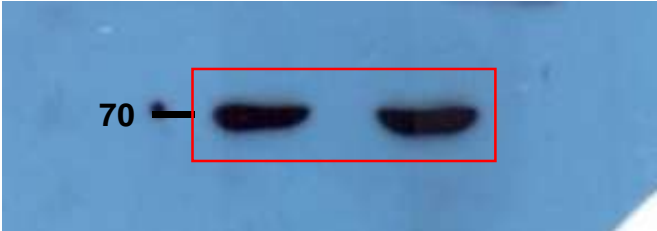

**WCE:  $\alpha$ -PRMT5**

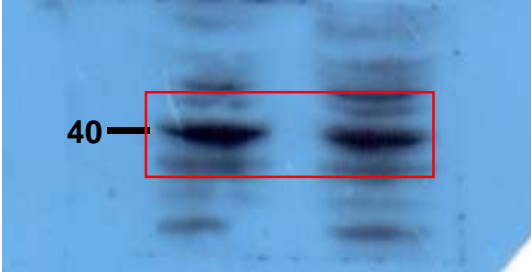

**WCE:  $\alpha$ -FAM47E**
